# Supplementary material for: Achieving fast interfacial solar vapor generation and aqueous acid purification using Ti3C2TxMXene/PANI non-woven fabrics
Source: Royal Society of Chemistry journal article supplement (doi:10.1039/d3mh00060e), 2023-01-01
Supplement: d3mh00060e2.pdf [file d3mh00060e2.pdf]

**- Supplementary Data -**

**Achieving fast interfacial solar vapor  
generation and aqueous acid purification in  
 $\text{Ti}_3\text{C}_2\text{T}_x$  MXene/PANI non-woven fabric**

Renjie Ding<sup>a</sup>, Jinhua Xiong<sup>a</sup>, Qian Yan<sup>a</sup>, Zhong Chen<sup>a</sup>, Zonglin Liu<sup>a</sup>, Xu Zhao<sup>a</sup>, Qingyu Peng<sup>a\*</sup>, and Xiaodong He<sup>a\*</sup>

<sup>a</sup>National Key Laboratory of Science and Technology on Advanced Composites in Special Environments, Center for Composite Materials and Structures, Harbin Institute of Technology, Harbin 150080, P. R. China

\*Corresponding authors.

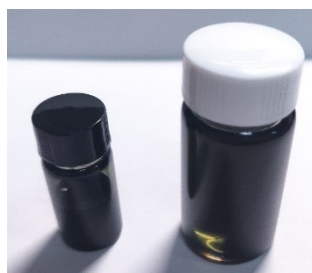

**Figure S1.** Digital image of  $\text{Ti}_3\text{C}_2\text{T}_x$  dispersed in NMP (left) and  $\text{Ti}_3\text{C}_2\text{T}_x$  DMAc dispersion at room temperature for 3 months (right).

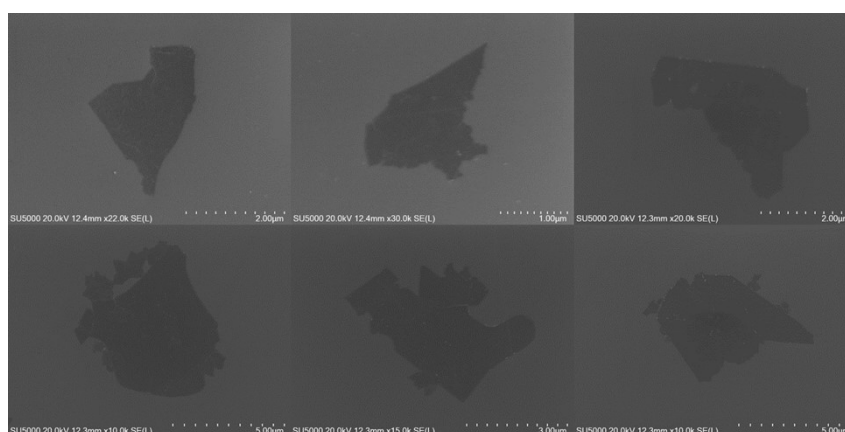

**Figure S2.** SEM image of  $\text{Ti}_3\text{C}_2\text{T}_x$  nanosheets.

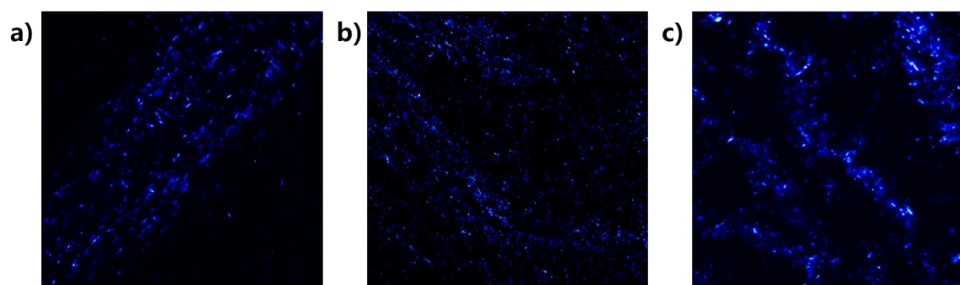

**Figure S3.** Liquid crystal of  $\text{Ti}_3\text{C}_2\text{T}_x$  organic solvent dispersion. a) 15 mg/ml. b) 30 mg/ml. c) 40 mg/ml.

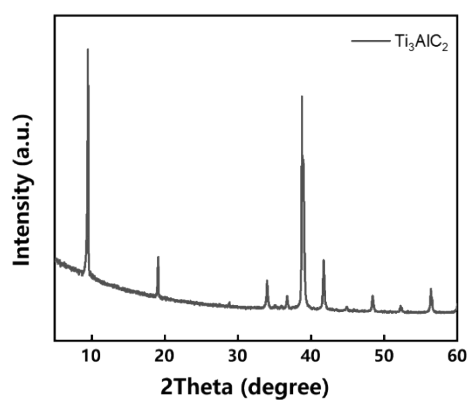

**Figure S4.** XRD pattern of MAX phase.

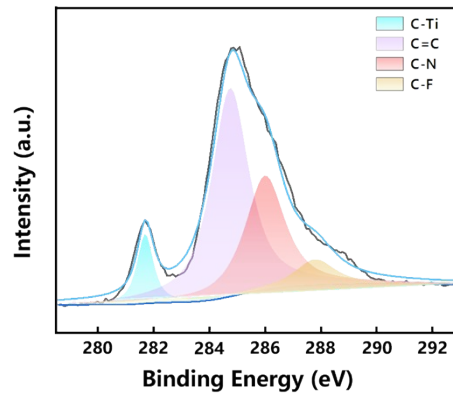

**Figure S5.** C 1S spectrum of MP1

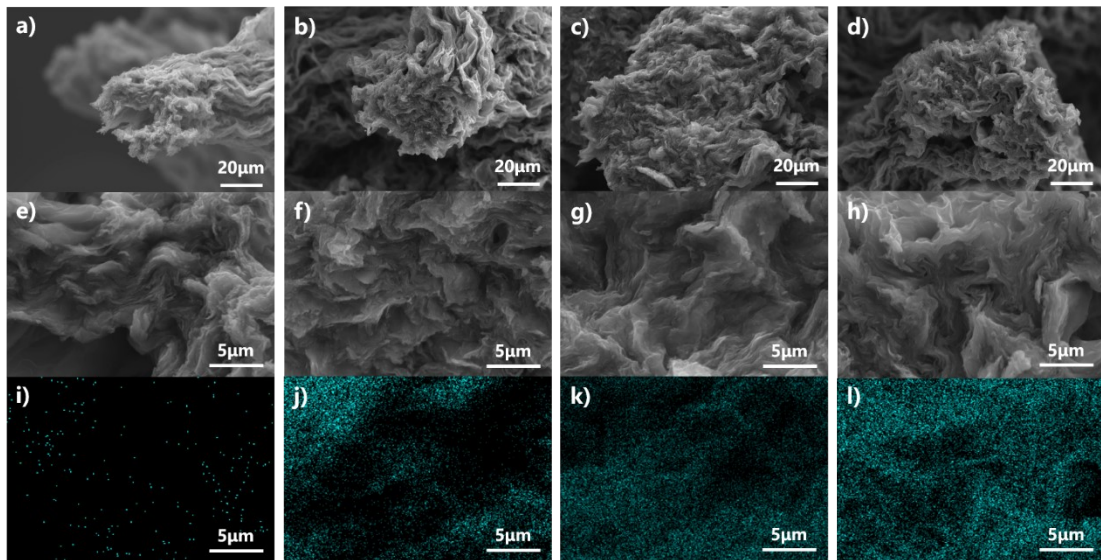

**Figure S6.** Cross sections and N mapping of composite fibers in MPs. a,e,i) MP0. b,f,j) MP1. c,g,k) MP2. d,h,l) MP3.

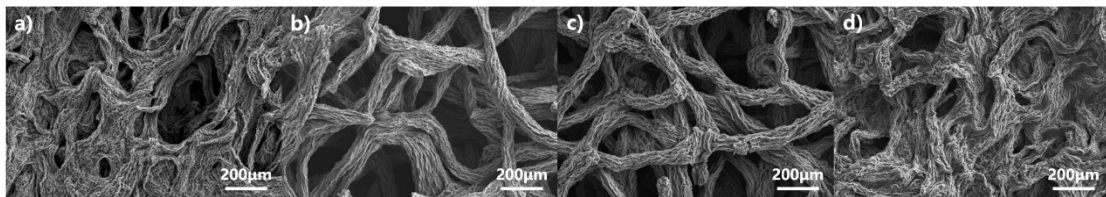

**Figure S7.** SEM image of MPs. a) MP0. b) MP1. c) MP2. d) MP3.

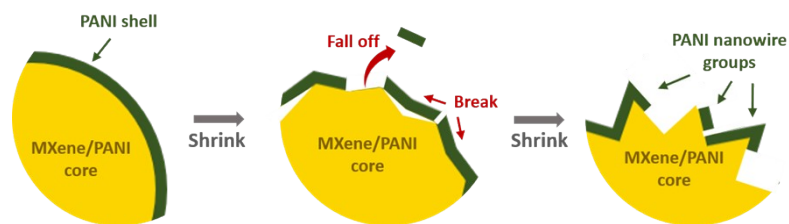

**Figure S8.** Schematic illustration of part of PANI falling off from composite fibers.

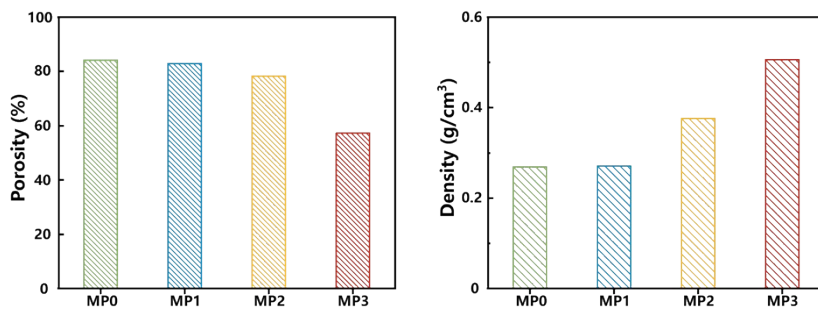

**Figure S9.** a) Porosity of MPs. b) Density of MPs.

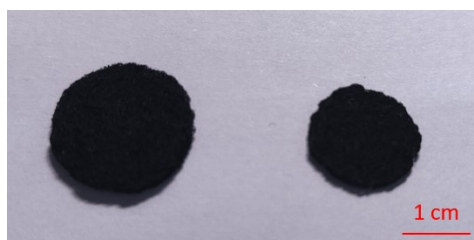

**Figure S10.** Digital image of MP1 (left) and MP3 (right).

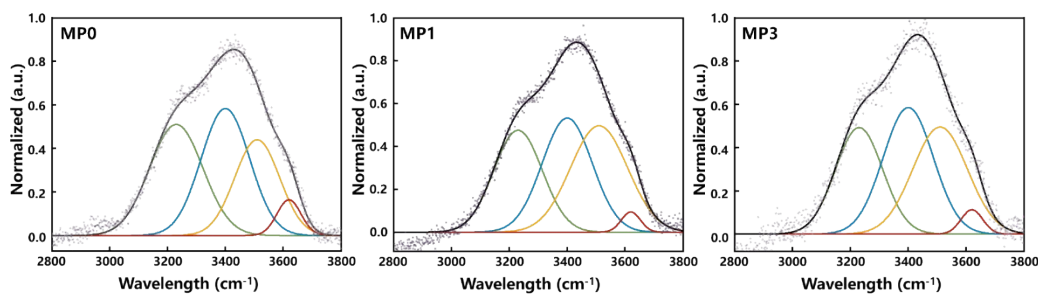

**Figure S11.** Raman spectra with fitting curves of MP0, MP1 and MP3.

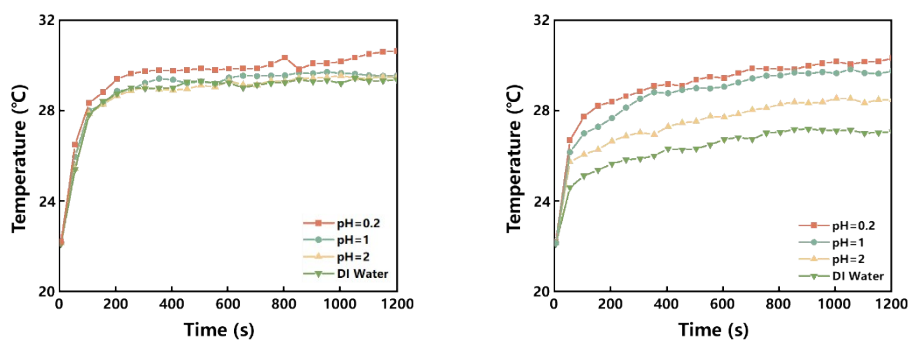

**Figure S12.** The surface temperature of MP1 (left) and MP2 (right) in water and aqueous acid with different pH value under one-sun illumination.

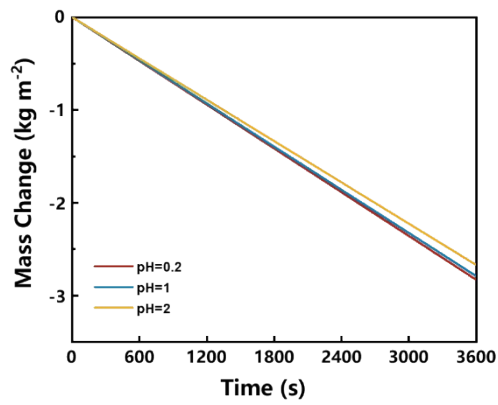

**Figure S13.** Time-dependent mass change of aqueous acid with MP2 working as steam generator.

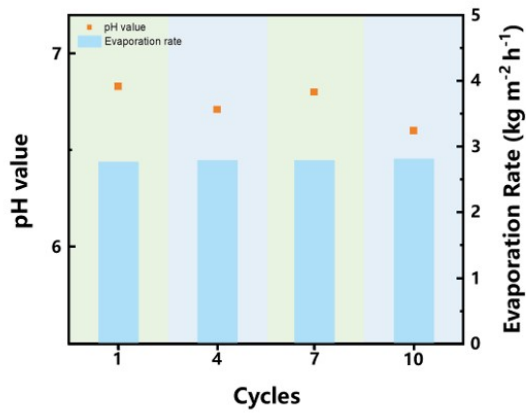

**Figure S14.** Cyclic tests of MP2 working as aqueous acid purifier and interfacial solar vapor generator in pH=1 aqueous acid.

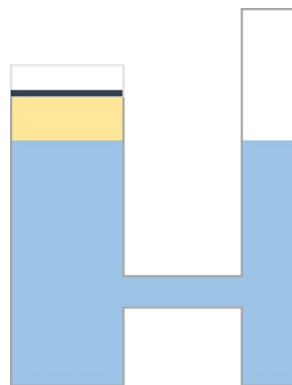

**Figure S15.** The designed water evaporation system for durable test.

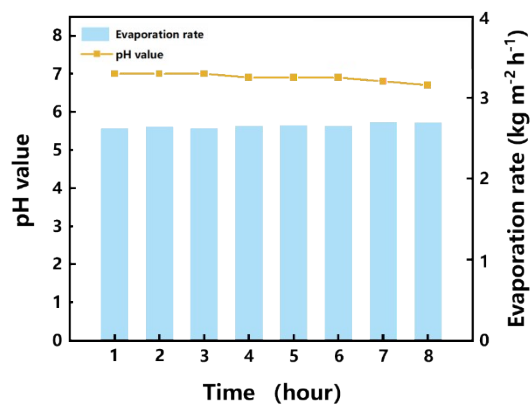

**Figure S16.** The durable test of MP2 in pH=4.5 aqueous acid.

**Table S1.** Comparison of solar vapor performances of MPs with other works.

| Materials                                                | Types                   | Light density (kW m <sup>-2</sup> ) | Evaporation rate (kg m <sup>-2</sup> h <sup>-1</sup> ) | Evaporation efficiency (%) | References |
|----------------------------------------------------------|-------------------------|-------------------------------------|--------------------------------------------------------|----------------------------|------------|
| PANI/PA                                                  | Membrane                | 1                                   | 1.00                                                   |                            | 1          |
| PANI/ZIF/PES                                             | Membrane                | 1                                   | 1.07                                                   | 66.8                       | 2          |
| PANI/PVDF                                                | Membrane                | 1                                   | 1.09                                                   | 74.15                      | 3          |
| PANI/TiO <sub>2</sub> /Melamine                          | Bilayer aerogel         | 1                                   | 2.12                                                   | 88.9                       | 4          |
| p-PEGDA/PANI                                             | Hydrogel                | 1                                   | 1.4                                                    | 91.5                       | 5          |
| Ti <sub>3</sub> C <sub>2</sub> T <sub>x</sub> /PVA       | Hydrogel                | 1                                   | 1.82                                                   | 73.5                       | 6          |
| Ti <sub>3</sub> C <sub>2</sub> T <sub>x</sub> /Porphyrin | Membrane                | 1                                   | 1.41                                                   | 86.4                       | 7          |
| PANI/Graphene                                            | Topographic PANI arrays | 1                                   | 1.42                                                   | 96.6                       | 8          |
| GO/PANI/ Ti <sub>3</sub> C <sub>2</sub> T <sub>x</sub>   | Flower-shaped aerogel   | 1                                   | 3.94                                                   | 135.6                      | 9          |
| PDA/PEI/ Ti <sub>3</sub> C <sub>2</sub> T <sub>x</sub>   | Vertical yarns arrays   | 1                                   | 3.95                                                   | 177.8                      | 10         |
| PANI/ Ti <sub>3</sub> C <sub>2</sub> T <sub>x</sub>      | Non-woven fabrics       | 1                                   | 2.65                                                   | 93.7                       | This work  |

## References

1. Wei, X., Peng, Y.B., Fang, W.X., Hu, Z.Y., Li, W.W., Zhang, S.X., and Jin, J. (2022). A polyaniline nanofiber array supported ultrathin polyamide membrane for solar-driven volatile organic compound removal. *Journal of Materials Chemistry A* *10*, 20424-20430. 10.1039/d2ta04909k.
2. Peng, Y.B., Wei, X., Wang, Y.J., Li, W.W., Zhang, S.X., and Jin, J. (2022). Metal-Organic Framework Composite Photothermal Membrane for Removal of High-Concentration Volatile Organic Compounds from Water via Molecular Sieving. *Acs Nano* *16*, 8329-8337. 10.1021/acsnano.2c02520.
3. Peng, Y.B., Wang, Y.J., Li, W.W., and Jin, J. (2021). Bio-inspired vertically aligned polyaniline nanofiber layers enabling extremely high-efficiency solar membrane distillation for water purification. *Journal of Materials Chemistry A* *9*, 10678-10684. 10.1039/d1ta01336j.
4. Pan, J.F., Yu, X.H., Dong, J.J., Zhao, L., Liu, L.L., Liu, J.L., Zhao, X.T., and Liu, L.F. (2021). Diatom-Inspired TiO<sub>2</sub>-PANi-Decorated Bilayer Photothermal Foam for Solar-Driven Clean Water Generation. *Acs Applied Materials & Interfaces* *13*, 58124-58133. 10.1021/acsnano.1c16603.
5. Yin, X.Y., Zhang, Y., Guo, Q.Q., Cai, X.B., Xiao, J.F., Ding, Z.F., and Yang, J. (2018). Macroporous Double-Network Hydrogel for High-Efficiency Solar Steam Generation Under 1 sun Illumination. *Acs Applied Materials & Interfaces* *10*, 10998-11007. 10.1021/acsnano.8b01629.
6. Zhang, B., Wong, P.W., and An, A.K. (2022). Photothermally enabled MXene hydrogel membrane with integrated solar-driven evaporation and photodegradation for efficient water purification. *Chemical Engineering Journal* *430*, 133054. 10.1016/j.cej.2021.133054.
7. Zhang, B., Gu, Q., Wang, C., Gao, Q., Guo, J., Wong, P.W., Liu, C.T., and An, A.K. (2021). Self-Assembled Hydrophobic/Hydrophilic Porphyrin-Ti<sub>3</sub>C<sub>2</sub>T<sub>x</sub> MXene Janus Membrane for Dual-Functional Enabled Photothermal Desalination. *Acs Applied Materials & Interfaces* *13*, 3762-3770. 10.1021/acsnano.1c16054.
8. Zhao, X., Meng, X., Zou, H., Wang, Z., Du, Y., Shao, Y., Qi, J., and Qiu, J. (2022). Topographic Manipulation of Graphene Oxide by Polyaniline Nanocone Arrays Enables High-Performance Solar-Driven Water Evaporation. *Advanced Functional Materials* *n/a*, 2209207. <https://doi.org/10.1002/adfm.202209207>.
9. Li, X.P., Li, X.F., Li, H.G., Zhao, Y., Wu, J., Yan, S.K., and Yu, Z.Z. (2022). Reshapable MXene/Graphene Oxide/Polyaniline Plastic Hybrids with Patternable Surfaces for Highly Efficient Solar-Driven Water Purification. *Advanced Functional Materials* *32*, 2110636. 10.1002/adfm.202110636.
10. Lei, Z., Zhu, S., Sun, X., Yu, S., Liu, X., Liang, K., Zhang, X., Qu, L., Wang, L., and Zhang, X. (2022). A Multiscale Porous 3D-Fabric Evaporator with Vertically Aligned Yarns Enables Ultra-Efficient and Continuous Water Desalination. *Advanced Functional Materials* *32*, 2205790. 10.1002/adfm.202205790.
